1

## Mechanical and Heat Hyperalgesia upon Withdrawal from Chronic Intermittent Ethanol Vapor depends on Sex, Exposure Duration and Blood Alcohol Concentration in Mice

1 **Authors:** AJ Brandner<sup>1,2,3,4, †</sup>, AM Baratta<sup>1,2, †</sup>, RS Rathod<sup>3</sup>, C Ferguson<sup>3</sup>, BK Taylor<sup>1,2,3,4\*\*††</sup>, SP  
2 Farris<sup>1,2,3,4,5\*††</sup>

3 <sup>1</sup>Center for Neuroscience, University of Pittsburgh School of Medicine, Pittsburgh, PA USA

4 <sup>2</sup>Pittsburgh Center for Pain Research, University of Pittsburgh School of Medicine, Pittsburgh,  
5 PA USA

6 <sup>3</sup>Department of Anesthesiology and Perioperative Medicine, University of Pittsburgh School of  
7 Medicine, Pittsburgh, PA USA

8 <sup>4</sup>Pittsburgh Project to end Opioid Misuse, University of Pittsburgh School of Medicine,  
9 Pittsburgh, PA USA

10 <sup>5</sup>Department of Biomedical Informatics, University of Pittsburgh School of Medicine,  
11 Pittsburgh, PA USA

12 <sup>†</sup>Co-first authors

13 <sup>††</sup>Co- senior authors

### 14 **Corresponding Authors:**

15 Sean P. Farris, Ph.D.

16 [farrissp@pitt.edu](mailto:farrissp@pitt.edu)

17 Bradley K. Taylor, Ph.D.

18 [bkt@pitt.edu](mailto:bkt@pitt.edu)

19

20 **Abstract**

21           Approximately half of patients with alcohol use disorder (AUD) report pain and this can  
22 be severe during withdrawal. However, many questions remain regarding the importance of sex,  
23 blood alcohol concentration (BAC), time course, and pain modality. To examine the impact of  
24 sex and BAC on the time course of the development of mechanical and heat hyperalgesia, we  
25 characterized a mouse model of Chronic Alcohol Withdrawal Induced Pain (CAWIP) in the  
26 presence or absence the alcohol dehydrogenase inhibitor, pyrazole. Male and female C57BL/6J  
27 mice underwent chronic intermittent ethanol vapor (CIEV)  $\pm$  pyrazole exposure for 4 weeks, 4  
28 days/week to induce ethanol dependence. Hind paw sensitivity to the plantar application of  
29 mechanical (von Frey filaments) and radiant heat stimuli were measured during weekly  
30 observations at 1, 3, 5, 7, 24, and 48 hr after cessation of ethanol exposure. In the presence of  
31 pyrazole, males developed mechanical hyperalgesia after the first week of CIEV exposure,  
32 peaking at 48 hours after cessation of ethanol. By contrast, females did not develop mechanical  
33 hyperalgesia until the fourth week; this also required pyrazole and did not peak until 48 hours.  
34 Heat hyperalgesia was consistently observed only in females exposed to ethanol and pyrazole;  
35 this developed after the first weekly session and peaked at 1 hour. We conclude that CAWIP  
36 develops in a sex –, time –, and BAC – dependent manner in C57BL/6J mice.

37

38 **Keywords:** Alcohol use disorder, pain, pyrazole, hypersensitivity, withdrawal, sex differences

## 39 **1 Introduction**

40 Alcohol use disorder (AUD) is characterized as compulsive intake of alcohol, binge  
41 drinking to high levels of intoxication (Carvalho et al., 2019; Edward and Koob, 2010), and  
42 physiological dependence (Becker, 2008; Koob & Le Moal, 2008). Dependence manifests as an  
43 alcohol withdrawal syndrome that includes negative emotional states when access to alcohol  
44 becomes limited or cut off completely (Heilig et al., 2010). Key negative emotional states that  
45 causally determine the escalation of casual drinking behavior to uncontrolled alcohol  
46 consumption are thought to include pain. Pain is a hallmark symptom in 43–73% of individuals  
47 with AUD, and manifests as increased hyperalgesia during alcohol withdrawal due to sensitized  
48 central and peripheral mechanisms (Apkarian et al., 2013; Edwards et al., 2020; Maleki et al.,  
49 2019; Robins et al., 2019; Zale et al., 2015). Conversely, escalation of alcohol consumption  
50 contributes to the development of hyperalgesia and chronic pain (Pahng & Edwards, 2021).  
51 Individuals with AUD often drink to relieve or prevent alcohol withdrawal-induced pain (Ditre et  
52 al., 2019; Egli et al., 2012; Jakubczyk et al., 2016; Maleki et al., 2019; Witkiewitz et al., 2015).  
53 Thus, prevention of withdrawal-induced pain may help individuals with AUD remain abstinent  
54 from alcohol. However, a better understanding of the mechanisms that lead to the development  
55 and maintenance of pain in AUD patients is needed. To address this gap in knowledge, we  
56 developed and characterized a mouse model of Chronic Alcohol Withdrawal Induced Pain  
57 (CAWIP). We focused on chronic intermittent ethanol vapor (CIEV) paradigms, “the gold  
58 standard” for the study of the physical signs of alcohol dependence: (Gilpin et al., 2009;  
59 Goldstein, 1972; Vendruscolo & Roberts, 2014).

60 In rodents, repeated cycles of ethanol exposure (in the diet, by oral gavage, or by vapor)  
61 and withdrawal are necessary to model alcohol dependence and the development of persistent

62 negative affective states (Becker & Lopez, 2004; Gilpin et al., 2009; Griffin III, Lopez, Yanke, et  
63 al., 2009; Rogers et al., 1979; Vendruscolo & Roberts, 2014). Alcohol withdrawal includes  
64 mechanical and heat hyperalgesia (Alongkronrusmee et al., 2016; Avegno et al., 2018; De Logu  
65 et al., 2019; Dina et al., 2000; Edwards et al., 2012; Fu et al., 2015; Gatch and Selvig, 2002;  
66 Kang et al., 2019; Pradhan et al., 2019; Quadir et al., 2021; Roltsch Hellard et al., 2017; Smith et  
67 al., 2017). However, these studies have not systematically considered key factors, including the  
68 impact of sex, ethanol exposure duration, time of testing after cessation of ethanol, nor blood  
69 alcohol concentration on the intensity of pain-like behaviors.

70 Previous studies have failed to incorporate females, despite the fact that females  
71 generally exhibit greater distress from painful stimuli, greater sensitivity to experimentally  
72 induced pain, and a weaker descending control of pain when compared to males (Paller et al.,  
73 2009; Popescu et al., 2010). In addition, women have a higher risk of exposure to alcohol than  
74 men during adolescence, which translates to higher occurrence and severity of AUD during  
75 adulthood (Foster et al., 2015, 2018). Despite these clinically relevant differences in pain  
76 sensitivity and AUD between males and females, previous studies have not examined sex –  
77 related differences on mechanical and heat sensitivities caused by chronic alcohol exposure and  
78 withdrawal. To address this gap, we evaluated CAWIP in both male and female mice.

79 Also, for the first time, we tracked behavior across multiple weekly sessions of CIEV,  
80 evaluated multiple modalities of hypersensitivity (both mechanical and heat), and measured  
81 hyperalgesia at several timepoints after the initiation of ethanol withdrawal. Finally, we  
82 conducted our studies in the presence or absence of the alcohol dehydrogenase inhibitor,  
83 pyrazole, which is well known to dramatically increase blood alcohol levels in mice.

## 84 **2 Methods**

## 85 2.1 Animal Husbandry

86 64 male and 64 female C57BL/6J mice were obtained from Jackson Laboratories (Bar  
87 Harbor, ME) and housed in a temperature (22 – 25°C) and humidity (30 – 70%) controlled room  
88 on a 12 – hour light/dark cycle (lights on at 7:00) with *ab libitum* access to food and water. Body  
89 weight was recorded twice a week from arrival to euthanasia. Upon arrival, mice acclimated to  
90 the facility in their home cage for at least one week. All protocols were approved by the  
91 Institutional Animal Care and Use Committee at the University of Pittsburgh and experiments  
92 were conducted in accordance with the National Institutes of Health Guidelines for the Care and  
93 Use of Laboratory Animals.

## 94 2.2 Chronic Intermittent Ethanol Exposure (CIEV)

95 32 mice of each sex underwent exposure to alcohol vapor as previously described  
96 (Goldstein, 1972). Each of the four sessions (Monday–Thursday) included 16 hours of exposure  
97 to ethanol (17:00 – 9:00), followed by 8 hours of exposure to ambient room air (9:00 – 17:00).  
98 32 mice of each sex served as Air – Control (AC) groups and were moved between housing  
99 racks and the induction chambers at 9:00 and 17:00 as were the CIEV groups. The temperature  
100 and humidity inside the chambers were maintained at 22 – 25°C and 30 – 70%, respectively.  
101 Circulating ethanol vapor levels within the chambers were monitored with a custom voltage  
102 sensor generously provided by Brian McCool (Wake Forest University). Cohorts were split into  
103 two main groups: alcohol exposed or air – control. The ethanol exposed group was further  
104 divided into two groups that received just ethanol (1.5 g/kg in saline, i.p Decon Labs, King of  
105 Prussia, PA) or ethanol (1.5 g/kg) with the alcohol dehydrogenase inhibitor pyrazole (68 mg/kg,  
106 i.p.; Sigma – Aldrich, P56607 – 6G; **Figure 1A**). The air – control group was also further

6

107 divided into two separate groups that received either pyrazole (68 mg/kg in saline) or just saline  
108 (Gibco, Waltham, MA; **Figure 1A**). After pre – CIEV or air – control treatment, animals were  
109 immediately placed into the ethanol induction or control chambers (**Figure 1B**). Three days of  
110 behavioral testing (Friday – Sunday) began the morning after the last CIEV session (**Figure 1C**).  
111 This pattern of 4 days of CIEV followed by 3 days of behavioral testing was continued for 4  
112 weeks (**Figure 1D**).



113

114 **Figure 1.** Graphical illustration of methods and timeline used in the current study. (A) Mice  
115 were separated into four groups and treated with 1.25 mg/kg EtOH + 1 mmol/kg pyrazole, 1.25  
116 mg/kg EtOH, 1 mmol/kg pyrazole, or saline. (B) EtOH treated mice were placed into vapor  
117 chambers and exposed to 16 hours of EtOH vapor followed by a period of 8 hours of ambient  
118 room air. AC mice were also placed into a different vapor chamber without the presence of  
119 EtOH. (C) Four mice from each treatment group were used for either hotplate or von Frey  
120 behavioral testing. (D) Schematic representation of the EtOH exposure and behavioral  
121 timeline.

122 Each week, blood alcohol concentrations (BACs) were assessed to ensure our  
123 experimental animals were experiencing dependent – like levels of alcohol. Blood was taken via  
124 tail vein after the third cycle of CIEV each week. Blood was centrifuged at 2300 x g for 5  
125 minutes and plasma was analyzed with an Analox Alcohol Analyzer (AM1, Analox Instruments,  
126 London, UK). Ethanol flow rate into the chamber was adjusted to maintain BACs between 175 –  
127 225 mg/dL in the pyrazole – treated CIEV group.

### 128 *2.3 Sensory Testing*

129 Mice were acclimated to either the hotplate or von Frey apparatuses in a temperature and  
130 light controlled room for one hour a day between 9:00 – 11:00 for three days, Friday through  
131 Sunday. For hotplate acclimation, mice on the first day were placed onto the apparatus at room  
132 temperature. On the second and third days, mice were placed onto the apparatus at 52.5°C and  
133 latency to response was recorded. Response latency typically decreased during these sessions,  
134 but then stabilized before baseline testing. Baseline testing commenced the following Monday  
135 before the first CIEV session. Upon removal from the CIEV chamber, mice were moved to the  
136 hotplate or von Frey apparatus and were tested after cessation of alcohol vapor at 1, 3, 5, 7, 24,  
137 and 48 hour timepoints, as many withdrawal symptoms in rodents occur 24 – 48 hours after  
138 cessation of alcohol (Heilig et al., 2010).

139 Hotplate Test. Mice were placed on a 10” x 10” hotplate heated to 52.5°C, enclosed  
140 within a 10” x 16” acrylic chamber (Columbus Instruments, Columbus, OH). Upon observation  
141 of a jump, or rapid flicking or licking a hind paw, the mouse was immediately removed, and  
142 response latency recorded (Deuis et al., 2017; Nelson et al., 2019). If no response was made  
143 within 30 seconds after placing mouse onto the hotplate, the animal was removed to avoid lasting  
144 tissue injury. Three trials were conducted at 10 – minute intervals and averaged.

145 Von Frey Test. Mice were placed on a wire–mesh rack within individual 4” x 4’ x 14”  
146 Plexiglas containers. After an acclimation period of at least 30 minutes, a set of eight  
147 monofilaments at logarithmic intervals from 0.008 to 6 grams (0.008, 0.023, 0.07, 0.16, 0.4, 1, 2,  
148 and 6 grams; Stoelting, Wood Dale, IL) were applied to the center of the plantar surface of the  
149 left hind paw for up to 4 seconds using the up–down method (Chaplan et al., 1994). A  
150 withdrawal response was defined by rapid retraction of the paw unrelated to normal ambulation.  
151 50% thresholds were calculated using methods as described by Chaplan et. al., and Dixon  
152 (Chaplan et al., 1994; Dixon, 1980).

#### 153 *2.4 Statistical Analysis*

154 Graphpad Software version 9.3.0 (La Jolla, CA) was used for graphical presentation and  
155 statistical analysis. Mechanical thresholds and heat latency data were analyzed separately. Data  
156 were first collapsed across Session (Weeks 1 – 4) and Time (hours 1 – 48 hours after cessation of  
157 treatment), and then analyzed the main effects of Treatment x Sex with two – way ANOVA;  
158 significant main effects were followed by post-hoc multiple comparisons. We then evaluated  
159 male and female data separately as well as weekly Session 1 – 4 data separately -- this enabled  
160 Treatment x Time two – way repeated measures ANOVA; significant main effects were  
161 followed by Sidak’s multiple comparison tests (for data collapsed across Session and Time) or  
162 Bonferroni *post-hoc* analysis (for data segregated by Sex and Session). Mann Whitney tests were  
163 used to analyze data between two groups at specific timepoints during alcohol withdrawal.  
164 Statistical significance was set at  $p < 0.05$ . All data are presented as mean  $\pm$  SEM. Degrees of  
165 freedom F and p values for the Treatment x Time two – way repeated measures ANOVA are  
166 reported in **Supplemental Table 1**.

### 167 **3 Results**

168 **3.1 Withdrawal from CIEV ± Pyrazole increases Mechanical and Heat Sensitivity**

169 We first evaluated the data when collapsed (averaged) across Session (Weeks 1 – 4) and  
170 Time (hours 1 – 48 after cessation of treatment), to focus on the overall effect of withdrawal  
171 from ethanol vapor exposure on mechanical and heat sensitivity.

172 **3.1.1 Administration of pyrazole alone did not change mechanical or heat sensitivity.**

173 To determine if administration of pyrazole itself influenced mechanical or heat  
174 sensitivity, **Supplemental Figures 1 & 2** compared the air control groups treated with either  
175 pyrazole or saline. Two – way ANOVA revealed no differences in either mechanical or heat  
176 sensitivity, regardless of sex ( $P > 0.05$ ). Therefore, the data of these control groups were  
177 combined into one group, henceforth referred to as “Air Control”, or “AC”. This AC group was  
178 included in subsequent analyses to determine whether withdrawal from CIEV ± pyrazole resulted  
179 in sex-dependent changes in mechanical or heat sensitivity (**Figure 2**).

180 **3.1.2 Mechanical hypersensitivity in both sexes.**

181 Two – way ANOVA (Treatment x Sex) revealed a main effect of Treatment ( $F(2, 58) =$   
182  $22.82, P < 0.001$ ). **Figure 2** illustrates that CIEV + Pyrazole cessation decreased mechanical  
183 sensitivity in each sex, with reductions in von Frey thresholds of 47% in males and 27% in  
184 females when compared to the AC groups, and of 36% in males when compared to the CIEV +  
185 Saline group ( $p < 0.05$  by multiple comparisons).

186 **3.1.3. Heat hypersensitivity only in females**

187 In females, two-way ANOVA (Treatment x Sex) revealed a main effect of Treatment ( $F$   
188  $(2, 58) = 5.84, P < 0.01$ ). CIEV + Pyrazole withdrawal decreased hotplate response latencies by

10

189 19% when compared to the AC group, and by 24% when compared to the CIEV + Saline group  
190 ( $p < 0.05$  by multiple comparisons). In males, CIEV + Pyrazole did not change hotplate latency  
191 ( $p > 0.05$ ).



192

193 **Figure 2. Effect of Chronic Intermittent Ethanol Vapor on von Frey thresholds and**  
194 **hotplate response latencies in males and females.** Data were averaged across Session (Weeks  
195 1 – 4 of CIEV) and Time (Hours 1 – 48 after cessation of CIEV). **A)** CIEV + Pyrazole cessation  
196 decreased mechanical sensitivity in both sexes. **B)** CIEV + Pyrazole cessation decreased but heat  
197 sensitivity in female but not male mice. All data are presented as mean  $\pm$  SEM. N=8 in each  
198 CIEV group; N=16 in Air Control (AC) group. \*  $P < 0.05$  CIEV + pyrazole compared to AC,  
199 CIEV + Saline compared to AC, or CIEV + Pyrazole compared to CIEV + Saline; \*\*  $P < 0.01$   
200 CIEV + Pyrazole compared to AC or CIEV + Pyrazole compared to CIEV + Saline; \*\*\*\*  $P <$   
201  $0.001$  CIEV + pyrazole compared to AC.

### 202 3.2. Time course of CIEV withdrawal-induced mechanical and heat hypersensitivity

203 We next determined the time course of mechanical and heat hypersensitivity with a  
204 week-by-week analysis of each cycle of CIEV and withdrawal (**Figures 3 – 4**). Statistical results  
205 are reported in **Supplemental Table 1**.

#### 206 3.2.1 Week 1

207 Mechanical Sensitivity. In males, two-way ANOVA (Treatment x Time) revealed a main  
208 effect of Time. CIEV + Pyrazole cessation decreased mechanical threshold compared to the AC  
209 group ( $p < 0.05$  by multiple comparisons), a decrease of 64% (**Figure 3A**). Mechanical thresholds

11

210 gradually decreased in the CIEV + Pyrazole group at hours 24 and 48 when compared to AC,  
211 with a peak effect of 63% at the 48 – hour timepoint. In females, no differences were observed  
212 (Figure 3B).



213

214 **Figure 3.** Mechanical thresholds for males (A, C, E, G) and females (B, D, F, H) across  
215 the withdrawal period during week 1 (A, B), week 2 (C, D), week 3 (E, F) and week 4 (G, H).  
216 Male mechanical sensitivity begins after one week of treatment of CIEV and becomes maximal  
217 after four weeks while the females first experience mechanical sensitivity after the third week of  
218 CIEV treatment. All data are presented at mean  $\pm$  SEM. N = 8 per EtOH exposed group, and 16  
219 per AC group. \* P < 0.05 CIEV + Pyrazole compared to AC; \*\* P < 0.01 CIEV + Pyrazole  
220 compared to AC; \*\*\* P < 0.001 CIEV + Pyrazole compared to AC.



222 **Figure 4.** Heat response latencies for males (A, C, E, G) and females (B, D, F, H) across the  
223 withdrawal period during week 1 (A, B), week 2 (C, D), week 3 (E, F) and week 4 (G, H).  
224 Female heat sensitivity begins after one week of treatment of CIEV and becomes maximal after  
225 four weeks while the males do not develop heat sensitivity after CIEV treatment. All data are  
226 presented at mean  $\pm$  SEM. N = 8 per EtOH exposed group, and 16 per AC group. \* P < 0.05  
227 CIEV + Pyrazole compared to AC; \*\* P < 0.01 CIEV + Pyrazole compared to AC.

228

229 Heat Sensitivity. We found main effects of Time, Treatment, and a Time x Treatment  
230 interaction, indicating that the effect of ethanol withdrawal was time-dependent in females  
231 (**Figure 4B**). CIEV + Pyrazole cessation decreased heat latency by an average of 27% when  
232 compared to the AC group at hour 3 and 5, with a peak effect of 29% when compared to the  
233 CIEV + saline group at hour 1 (p<0.05 by multiple comparisons). In males, no differences were  
234 observed (**Figure 4A**).

235 *3.2.2 Week 2*

236 Mechanical Sensitivity. In males, two-way ANOVA revealed main effects of Time,  
237 Treatment, and a Time x Treatment interaction, indicating that the effect of ethanol withdrawal  
238 was time-dependent. CIEV + Pyrazole cessation gradually decreased mechanical threshold  
239 compared to the AC group at hours 1, 24, and 48 during the withdrawal period (p<0.05 by  
240 multiple comparisons), with a peak effect of 70% at the 48 – hour timepoint (**Figure 3D**). In  
241 females, no differences in mechanical thresholds were detected.

242 Heat Sensitivity. We found a main effect of Treatment and a Treatment x Time  
243 interaction in female mice, indicating that the effect of ethanol withdrawal was time-dependent  
244 (**Figure 4D**). CIEV + Pyrazole cessation decreased heat response latency by 39% when  
245 compared to the AC group during hour 1 of withdrawal, and by 40% as compared to the CIEV +  
246 Saline group during hour 1 of withdrawal (p<0.05 by multiple comparisons). We report a

247 Treatment x Time interaction in males, but multiple comparisons test did not confirm differences  
248 at specific time points. To avoid a type II error, further analysis was conducted with non –  
249 parametric Mann Whitney tests. These revealed a significant decrease in heat response latency in  
250 the male CIEV + Pyrazole group when compared to AC during hour 1 of withdrawal (CIEV +  
251 Pyrazole: mean =  $9.91 \pm 1.74$ , median = 10.45; AC group: mean =  $15.24 \pm 1.02$ , median = 15.15;  
252  $P < 0.05$  by two – tailed Mann Whitney test).

### 253 3.2.3 Week 3

254 Mechanical Sensitivity. In males, two-way ANOVA revealed main effects of Treatment,  
255 Time, and a Treatment x Time interaction, indicating that the effect of ethanol withdrawal was  
256 time dependent. CIEV + Pyrazole cessation rapidly decreased mechanical threshold compared to  
257 the AC group at hours 7, 24, and 48 ( $p < 0.05$  by multiple comparisons), with a peak effect of 77%  
258 at the 24 – hour timepoint (**Figure 3E**). Females exhibited main effects of Treatment and Time,  
259 and CIEV + pyrazole decreased mechanical thresholds by 58% during the 3rd hour of  
260 withdrawal (**Figure 3F**).

261 Heat Sensitivity. We found main effects of Treatment and a Treatment x Time interaction  
262 in females. CIEV + Pyrazole cessation decreased heat response latency by 31% as compared to  
263 AC and by 37% as compared to CIEV + saline during hour 1 of withdrawal ( $p < 0.05$  by multiple  
264 comparisons; **Figure 4F**). In males, we found a Treatment x Time interaction that could not be  
265 confirmed with multiple comparisons test using the Bonferroni correction. Subsequent non –  
266 parametric tests revealed a significant decrease in heat response latency in the male CIEV +  
267 Pyrazole group when compared to AC during hour 1, 3, and 5 of withdrawal (Hour 1: CIEV +  
268 Pyrazole mean =  $9.76 \pm 0.8$ , median = 9.60; AC mean =  $13.20 \pm 0.70$ , median = 13.71,  $p < 0.01$ .  
269 Hour 3: CIEV + Pyrazole mean =  $11.58 \pm 1.30$ , median = 11.30; AC mean =  $14.94 \pm 0.59$ ,

270 median = 14.80;  $p < 0.05$ . Hour 5: CIEV + Pyrazole: mean =  $12.58 \pm 1.16$ , median = 12.15; AC  
271 mean =  $15.52 \pm 0.62$ , median = 15.70,  $p < 0.05$ . All by two – tailed Mann Whitney test).

#### 272 *3.2.4 Week 4*

273 Mechanical Sensitivity. In males, two-way ANOVA revealed a main effect of Treatment,  
274 Time, and a Treatment x Time interaction, indicating that the effect of alcohol withdrawal was  
275 time dependent. CIEV + Pyrazole cessation rapidly decreased mechanical threshold compared to  
276 the AC group at hours 1, 7, 24, and 48 ( $p < 0.05$  by multiple comparisons), with a peak effect of  
277 77% at the 48 – hour timepoint (**Figure 3G**). In females, we observed main effects of Treatment,  
278 Time, and a Treatment x Time interaction, and CIEV + pyrazole gradually decreased mechanical  
279 thresholds by 57% when compared to AC at hour 48 during withdrawal (**Figure 3H**).

280 Heat Sensitivity. We found main effects of Treatment, Time, and a Treatment x Time  
281 interaction in females. CIEV + Pyrazole cessation decreased heat response latency as compared  
282 to the AC control group in hours 1 and 5 during withdrawal, with a peak effect of 30% at the 1 –  
283 hour timepoint. (**Figure 4H**). There were no main effect of CIEV + pyrazole in males.

#### 284 **3.3. Blood Alcohol Concentrations**

285 As expected, inhibition of alcohol dehydrogenase with pyrazole dramatically increased  
286 BACs to the 150–250 mg/dL range at the end of 16h of exposure in both male and female mice  
287 exposed to CIEV (**Supplemental Figure 3**).

#### 288 **Discussion**

289 Chronic alcohol withdrawal-induced pain (CAWIP) has been studied with a variety of  
290 paradigms in rats and mice. We chose a model of chronic intermittent ethanol vapor (CIEV)

291 because it is now recognized as the gold standard in the study of alcohol dependence, allows for  
292 precise control of blood alcohol concentration (BAC), and provides reliable and repeatable  
293 outcome measures, including mechanical and heat hypersensitivity. Our study establishes the  
294 effects of multiple cycles of chronic alcohol vapor exposure and subsequent withdrawal periods  
295 on mechanical and heat sensitivity in male and female mice and reveals several important  
296 principles in the use of CIEV to study CAWIP. First, we noted that previous studies of alcohol  
297 dependence (i.e. alcohol consumption and anxiety-like behaviors upon cessation of alcohol) were  
298 restricted to CIEV in the presence of pyrazole (Becker et al., 1997; Griffin III, Lopez, & Becker,  
299 2009; Kliethermes et al., 2004; Littleton et al., 1974). To determine whether pyrazole was  
300 necessary for other signs of alcohol dependence (in this case, pain-like behaviors upon cessation  
301 of alcohol), we included groups that did not receive pyrazole. We found that pyrazole increased  
302 the severity of mechanical hyperalgesia in a “dose response-like” manner and was necessary for  
303 the detection of heat hyperalgesia. These results confirm that pyrazole is a necessary component  
304 of CIEV protocols to study CAWIP. Second, previous studies were restricted to male rats or  
305 mice. We studied both male and female mice, leading to the discovery of two dramatic sex  
306 differences: males exhibited greater mechanical hyperalgesia, while only females exhibited heat  
307 hyperalgesia. Third, previous studies were restricted to analysis of just one session of pain-like  
308 behaviors after cessation of CIEV. To determine the developmental time course of CAWIP, we  
309 evaluated behavior on four consecutive weeks. We found that mechanical hyperalgesia peaked  
310 after 3 weekly cycles of CIEV, and this continued for at least one additional week.

311 *Pyrazole is necessary for the full manifestation of CAWIP*

312 Pyrazole is an alcohol dehydrogenase inhibitor that inhibits the metabolism of alcohol  
313 into acetaldehyde. In mouse models of CIEV, pyrazole is required to achieve BACs at levels

314 necessary to achieve dependence (Becker & Lopez, 2004; Griffin III, Lopez, Yanke, et al.,  
315 2009). Pyrazole alone can produce toxic effects in mice such as weight loss and liver necrosis  
316 when combined with alcohol (Goldstein & Pal, 1971; Lelbach, 1969). One group found a strong  
317 withdrawal phenotype in CIEV treated mice without the usage of pyrazole, suggesting that  
318 pyrazole is not needed in mouse CIEV studies (Eisenhardt et al., 2015). We found that pyrazole  
319 substantially increased BACs in the setting of CIEV, while treatment of the AC + Pyrazole group  
320 showed no differences in body weight and pain sensitivity when compared to the AC + Saline  
321 group in both males and females. Importantly, pyrazole increased the severity of mechanical  
322 hyperalgesia in a “dose response-like” manner and was necessary for the detection of heat  
323 hyperalgesia. These results confirm that pyrazole is a necessary component of CIEV protocols to  
324 study CAWIP. Our CIEV + Saline groups achieved significantly lower BALs throughout the  
325 experiment when compared to the CIEV + Pyrazole groups (Supplemental Figure 3).

326 *CIEV produced heat hyperalgesia only in female mice.*

327 We found that CIEV decreased heat response latency in female but not male mice. By  
328 contrast, one previous study (restricted to males only) indicates that chronic alcohol exposure via  
329 intermittent access to two – bottle choice (IA2BC) produces heat hypersensitivity 24 hours into  
330 the withdrawal period (Quadir et al., 2021). This study used radiant heat to stimulate a paw  
331 withdrawal response; by contrast, we placed mice on a hotplate and recorded a response to be  
332 represented not only by paw lifting, but also licking or jumping. We do not believe that our  
333 contrasting data is a result of different testing modalities since both hotplate and Hargreaves both  
334 require the integration of supraspinal pain pathways. (Deuis et al., 2017). Heat hypersensitivity is  
335 seen during withdrawal in male rats subjected to liquid diet, IA2BC, and CIEV models of  
336 alcohol dependence (Avegno et al., 2018; Dina et al., 2000; Fu et al., 2015; Kang et al., 2019,

337 2019; Roltsch Hellard et al., 2017). Little data is available showing alcohol withdrawal – induced  
338 heat hypersensitivity in male and female mice, however, one study showed no effect of repeated  
339 cycles of CIEV and withdrawal on heat sensitivity in both male and female HS/Npt mice (Metten  
340 et al., 2018). We conclude that only female mice experience heat sensitivity as a result of CIEV  
341 and withdrawal. Sex – dependent mechanisms in heat nociception could explain why we see heat  
342 sensitivity in females and not males in our study.

### 343 *Males are More Sensitive to Mechanical Stimuli After CIEV*

344 We discovered that male mice exhibit greater mechanical hyperalgesia than female mice.  
345 Our results are consistent with previous reports of mechanical sensitivity after withdrawal from  
346 chronic alcohol exposure, albeit restricted to just male mice. (Alongkronrusmee et al., 2016; De  
347 Logu et al., 2019; Quadir et al., 2021; Smith et al., 2017). Male C57BL/6 mice experienced  
348 mechanical sensitivity 24 and 48 hours into withdrawal from alcohol administered via oral  
349 gavage, and this sensitivity become more pronounced after each subsequent week of alcohol  
350 administration (Alongkronrusmee et al., 2016). This result is similar to those from our study  
351 where multiple cycles of CIEV, and withdrawal produced greater mechanical sensitivity. In a  
352 IA2BC paradigm, mechanical sensitivity was seen 24 hours into the withdrawal period in male  
353 C57BL/6J mice (Quadir et al., 2021; Smith et al., 2017). We can confirm mechanical sensitivity  
354 at the 24 – and 48 – hour withdrawal period in the CIEV model of alcohol dependence. Little  
355 data is available showing mechanical sensitivity in female mice using any model of alcohol  
356 dependence, and we are the first to directly compare mechanical thresholds in male and female  
357 mice after repeated cycles of CIEV and withdrawal. In a rat model of CAWIP, one study showed  
358 decreased mechanical thresholds in female rats 1 week after discontinuation of a nine weeks of  
359 alcohol administration via liquid diet (Cucinello-Ragland et al., 2021). However, they did not

360 test for mechanical sensitivity during the critical 24 – and 48 – hour withdrawal period where  
361 physiological signs of dependence are maximal. Overall, multiple cycles of CIEV and  
362 withdrawal produced robust mechanical sensitivity in our male mice during the 24 – and 48 –  
363 hour of the withdrawal period, while females experienced mechanical sensitivity during the 48 –  
364 hour of the withdrawal period.

### 365 *Development of Mechanical and Heat Sensitivity during repeated sessions of CIEV*

366 Previous studies were restricted to analysis of just one session of pain-like behaviors after  
367 cessation of CIEV. To determine the developmental time course of CAWIP, we evaluated  
368 behavior on four consecutive weeks, using a repeated-measures design that that evaluated  
369 multiple time points within a 48–hour withdrawal period. We found that male mice rapidly  
370 developed mechanical hypersensitivity after one cycle of CIEV, whereas female mice did not  
371 exhibit mechanical hypersensitivity until the latter weeks. Mechanical sensitivity in male mice  
372 increased after each subsequent week of CIEV and peaked after three weeks. This pattern  
373 reflects what is seen in voluntary drinking studies using CIEV in male mice, where voluntary  
374 alcohol drinking increases after each subsequent cycle of CIEV and withdrawal. (Griffin III,  
375 Lopez, Yanke, et al., 2009; Lopez & Becker, 2005). However, it took the females three cycles of  
376 CIEV to experience mechanical sensitivity initially and did not increase after the subsequent  
377 fourth week. We conclude that mechanical hyperalgesia peaked after 3 weekly cycles of CIEV,  
378 and this continued for at least one additional week in both sexes.

379 Overall, heat sensitivity is seen in female mice, but not males, after chronic alcohol  
380 exposure via treatment with CIEV and Pyrazole. Female mice experienced heat sensitivity  
381 during early withdrawal timepoints across all four weeks. The male counterparts did not due to  
382 high variability in their behavior. During week 2 and 3, heat sensitivity in the male group is

383 present but was not picked up using conservative statistical methods. Upon further analysis, non  
384 – parametric Mann Whitney tests revealed statistical support for potential heat sensitivity in the  
385 male CIEV + pyrazole group when compared to AC males during early withdrawal timepoints.  
386 Further analysis needs to be conducted with larger sample sizes to account for variability we saw  
387 in our male hotplate data. We believe that three to four cycles of CIEV and withdrawal is enough  
388 to produce a dependent-like phenotype in male and female C57BL/6J mice, as seen through  
389 increased mechanical and heat sensitivity.

### 390 *Conclusion*

391 This is the first report of sex differences in CIEV withdrawal – induced pain. We  
392 conclude that male and female mice experience dramatic differences in mechanical and heat  
393 hypersensitivity. Future studies will identify key neurochemical systems and brain regions that  
394 can contribute to CAWIP and to target these with pharmacological intervention. In summary, we  
395 demonstrate that four weeks of CIEV is sufficient to produce mechanical hyperalgesia in both  
396 male and female C57BL/6J mice, and heat hyperalgesia in female C57BL/6J mice. The pain  
397 associated with chronic alcohol use disorder is incredibly debilitating and disrupts cognitive  
398 function, and so it will be imperative to test the affective component of CAWIP, as well as to  
399 study the different supraspinal mechanisms by which this occurs.

400

401 **Conflict of Interest:** The authors have no conflicts of interest to disclose.

402 **Acknowledgements:** We gratefully acknowledge the support of NIAAA, NIDA, and NINDS  
403 grants AA024836 (SPF), AA020889 (SPF), AA029942 (AMB), DA037621 (BKT), NS045954  
404 (BKT), NS112632 (BKT), NS073548 (AJB).

405

406 **References**

- 407 Alongkronrusmee, D., Chiang, T., & van Rijn, R. M. (2016). Involvement of delta opioid  
408 receptors in alcohol withdrawal-induced mechanical allodynia in male C57BL/6 mice. *Drug and*  
409 *Alcohol Dependence*, 167, 190–198. <https://doi.org/10.1016/j.drugalcdep.2016.08.017>
- 410 Apkarian, A. V., Neugebauer, V., Koob, G., Edwards, S., Levine, J. D., Ferrari, L., Egli, M., &  
411 Regunathan, S. (2013). Neural mechanisms of pain and alcohol dependence. *Pharmacology*  
412 *Biochemistry and Behavior*, 112, 34–41. <https://doi.org/10.1016/j.pbb.2013.09.008>
- 413 Avegno, E. M., Lobell, T. D., Itoga, C. A., Baynes, B. B., Whitaker, A. M., Weera, M. M.,  
414 Edwards, S., Middleton, J. W., & Gilpin, N. W. (2018). Central Amygdala Circuits Mediate  
415 Hyperalgesia in Alcohol-Dependent Rats. *The Journal of Neuroscience*, 38(36), 7761–7773.  
416 <https://doi.org/10.1523/JNEUROSCI.0483-18.2018>
- 417 Becker, H. C. (2008). Alcohol Dependence, Withdrawal, and Relapse. *Alcohol Research &*  
418 *Health*, 31(4), 348–361.
- 419 Becker, H. C., Diaz-Granados, J. L., & Weathersby, R. T. (1997). Repeated ethanol withdrawal  
420 experience increases the severity and duration of subsequent withdrawal seizures in mice.  
421 *Alcohol*, 14(4), 319–326. [https://doi.org/10.1016/S0741-8329\(97\)87949-9](https://doi.org/10.1016/S0741-8329(97)87949-9)
- 422 Becker, H. C., & Lopez, M. F. (2004). Increased Ethanol Drinking After Repeated Chronic  
423 Ethanol Exposure and Withdrawal Experience in C57BL/6 Mice: *Alcoholism: Clinical &*  
424 *Experimental Research*, 28(12), 1829–1838.  
425 <https://doi.org/10.1097/01.ALC.0000149977.95306.3A>
- 426 Bergeson, S. E., Blanton, H., Martinez, J. M., Curtis, D. C., Sherfey, C., Seegmiller, B.,  
427 Marquardt, P. C., Groot, J. A., Allison, C. L., Bezboruah, C., & Guindon, J. (2016). Binge  
428 Ethanol Consumption Increases Inflammatory Pain Responses and Mechanical and Cold  
429 Sensitivity: Tigecycline Treatment Efficacy Shows Sex Differences. *Alcoholism: Clinical and*  
430 *Experimental Research*, 40(12), 2506–2515. <https://doi.org/10.1111/acer.13252>
- 431 Carvalho, A. F., Heilig, M., Perez, A., Probst, C., & Rehm, J. (2019). Alcohol use disorders. *The*  
432 *Lancet*, 394(10200), 781–792. [https://doi.org/10.1016/S0140-6736\(19\)31775-1](https://doi.org/10.1016/S0140-6736(19)31775-1)
- 433 Chaplan, S. R., Bach, F. W., Pogrel, J. W., Chung, J. M., & Yaksh, T. L. (1994). Quantitative  
434 assessment of tactile allodynia in the rat paw. *Journal of Neuroscience Methods*, 53(1), 55–63.  
435 [https://doi.org/10.1016/0165-0270\(94\)90144-9](https://doi.org/10.1016/0165-0270(94)90144-9)
- 436 Cucinello-Ragland, J. A., Mitchell-Cleveland, R., Bradley Trimble, W., Urbina, A. P., Yeh, A.  
437 Y., Edwards, K. N., Molina, P. E., Simon Peter, L., & Edwards, S. (2021). Alcohol amplifies  
438 cingulate cortex signaling and facilitates immobilization-induced hyperalgesia in female rats.  
439 *Neuroscience Letters*, 761, 136119. <https://doi.org/10.1016/j.neulet.2021.136119>
- 440 De Logu, F., Li Puma, S., Landini, L., Portelli, F., Innocenti, A., de Araujo, D. S. M., Janal, M.  
441 N., Patacchini, R., Bunnett, N. W., Geppetti, P., & Nassini, R. (2019). Schwann cells expressing

- 442 nociceptive channel TRPA1 orchestrate ethanol-evoked neuropathic pain in mice. *Journal of*  
443 *Clinical Investigation*, 129(12), 5424–5441. <https://doi.org/10.1172/JCI128022>
- 444 Deuis, J. R., Dvorakova, L. S., & Vetter, I. (2017). Methods Used to Evaluate Pain Behaviors in  
445 Rodents. *Frontiers in Molecular Neuroscience*, 10, 284.  
446 <https://doi.org/10.3389/fnmol.2017.00284>
- 447 Dina, O. A., Barletta, J., Chen, X., Mutero, A., Martin, A., Messing, R. O., & Levine, J. D.  
448 (2000). Key Role for the Epsilon Isoform of Protein Kinase C in Painful Alcoholic Neuropathy  
449 in the Rat. *The Journal of Neuroscience*, 20(22), 8614–8619.  
450 <https://doi.org/10.1523/JNEUROSCI.20-22-08614.2000>
- 451 Ditre, J. W., Zale, E. L., & LaRowe, L. R. (2019). A Reciprocal Model of Pain and Substance  
452 Use: Transdiagnostic Considerations, Clinical Implications, and Future Directions. *Annual*  
453 *Review of Clinical Psychology*, 15(1), 503–528. [https://doi.org/10.1146/annurev-clinpsy-050718-](https://doi.org/10.1146/annurev-clinpsy-050718-095440)  
454 [095440](https://doi.org/10.1146/annurev-clinpsy-050718-095440)
- 455 Dixon, W. J. (1980). Efficient Analysis of Experimental Observations. *Annual Review of*  
456 *Pharmacology and Toxicology*, 20(1), 441–462.  
457 <https://doi.org/10.1146/annurev.pa.20.040180.002301>
- 458 Edward and Koob. (2010). Neurobiology of dysregulated motivational systems in drug addiction.  
459 *Future Neurology*, 5(3), 393–410. <https://doi.org/10.2217/fnl.10.14>
- 460 Edwards, S., Vendruscolo, L. F., Gilpin, N. W., Wojnar, M., & Witkiewitz, K. (2020). Alcohol  
461 and Pain: A Translational Review of Preclinical and Clinical Findings to Inform Future  
462 Treatment Strategies. *Alcoholism: Clinical and Experimental Research*, 44(2), 368–383.  
463 <https://doi.org/10.1111/acer.14260>
- 464 Edwards, S., Vendruscolo, L. F., Schlosburg, J. E., Misra, K. K., Wee, S., Park, P. E., Schulteis,  
465 G., & Koob, G. F. (2012). Development of Mechanical Hypersensitivity in Rats During Heroin  
466 and Ethanol Dependence: Alleviation by CRF1 Receptor Antagonism. *Neuropharmacology*,  
467 62(2), 1142–1151. <https://doi.org/10.1016/j.neuropharm.2011.11.006>
- 468 Egli, M., Koob, G. F., & Edwards, S. (2012). Alcohol dependence as a chronic pain disorder.  
469 *Neuroscience & Biobehavioral Reviews*, 36(10), 2179–2192.  
470 <https://doi.org/10.1016/j.neubiorev.2012.07.010>
- 471 Eisenhardt, M., Hansson, A. C., Spanagel, R., & Bilbao, A. (2015). Chronic intermittent ethanol  
472 exposure in mice leads to an up-regulation of CRH/CRHR1 signaling. *Alcoholism, Clinical and*  
473 *Experimental Research*, 39(4), 752–762. <https://doi.org/10.1111/acer.12686>
- 474 Finn, D. A., Hashimoto, J. G., Cozzoli, D. K., Helms, M. L., Nipper, M. A., Kaufman, M. N.,  
475 Wiren, K. M., & Guizzetti, M. (2018). Binge Ethanol Drinking Produces Sexually Divergent and  
476 Distinct Changes in Nucleus Accumbens Signaling Cascades and Pathways in Adult C57BL/6J  
477 Mice. *Frontiers in Genetics*, 9. <https://www.frontiersin.org/article/10.3389/fgene.2018.00325>

- 478 Foster, K. T., Hicks, B. M., Durbin, C. E., Iacono, W. G., & McGue, M. (2018). The gender risk-  
479 severity paradox for alcohol use disorder from adolescence through young adulthood. *Emerging*  
480 *Adulthood (Print)*, 6(6), 375–386. <https://doi.org/10.1177/2167696817740453>
- 481 Foster, K. T., Hicks, B. M., Iacono, W. G., & McGue, M. (2015). Gender Differences in the  
482 Structure of Risk for Alcohol Use Disorder in Adolescence and Young Adulthood.  
483 *Psychological Medicine*, 45(14), 3047–3058. <https://doi.org/10.1017/S0033291715001014>
- 484 Fu, R., Gregor, D., Peng, Z., Li, J., Bekker, A., & Ye, J. (2015). Chronic intermittent voluntary  
485 alcohol drinking induces hyperalgesia in Sprague-Dawley rats. *International Journal of*  
486 *Physiology, Pathophysiology and Pharmacology*, 7(3), 136–144.
- 487 Gatch, M. B., & Selvig, M. (2002). THEOPHYLLINE BLOCKS ETHANOL WITHDRAWAL-  
488 INDUCED HYPERALGESIA. *Alcohol and Alcoholism*, 37(4), 313–317.  
489 <https://doi.org/10.1093/alcalc/37.4.313>
- 490 Gilpin, N. W., Smith, A. D., Cole, M., Weiss, F., Koob, G. F., & Richardson, H. N. (2009).  
491 Operant Behavior and Alcohol Levels in Blood and Brain of Alcohol-Dependent Rats.  
492 *Alcoholism: Clinical and Experimental Research*, 33(12), 2113–2123.  
493 <https://doi.org/10.1111/j.1530-0277.2009.01051.x>
- 494 Goldstein, D. B. (1972). Relationship of alcohol dose to intensity of withdrawal signs in mice.  
495 *The Journal of Pharmacology and Experimental Therapeutics*, 180(2), 203–215.
- 496 Goldstein, D. B., & Pal, N. (1971). Alcohol Dependence Produced in Mice by Inhalation of  
497 Ethanol: Grading the Withdrawal Reaction. *Science*, 172(3980), 288–290.
- 498 Griffin III, W. C., Lopez, M. F., & Becker, H. C. (2009). Intensity and Duration of Chronic  
499 Ethanol Exposure Is Critical for Subsequent Escalation of Voluntary Ethanol Drinking in Mice.  
500 *Alcoholism: Clinical and Experimental Research*, 33(11), 1893–1900.  
501 <https://doi.org/10.1111/j.1530-0277.2009.01027.x>
- 502 Griffin III, W. C., Lopez, M. F., Yanke, A. B., Middaugh, L. D., & Becker, H. C. (2009).  
503 Repeated cycles of chronic intermittent ethanol exposure in mice increases voluntary ethanol  
504 drinking and ethanol concentrations in the nucleus accumbens. *Psychopharmacology*, 201(4),  
505 569–580. <https://doi.org/10.1007/s00213-008-1324-3>
- 506 Heilig, M., Egli, M., Crabbe, J. C., & Becker, H. C. (2010). Acute withdrawal, protracted  
507 abstinence and negative affect in alcoholism: Are they linked? *Addiction Biology*, 15(2), 169–  
508 184. <https://doi.org/10.1111/j.1369-1600.2009.00194.x>
- 509 Jakubczyk, A., Ilgen, M., Kopera, M., Krasowska, A., Klimkiewicz, A., Bohnert, A., Blow, F.,  
510 Brower, K., & Wojnar, M. (2016). Reductions in physical pain predict lower risk of relapse  
511 following alcohol treatment. *Drug and Alcohol Dependence*, 158, 167–171.  
512 <https://doi.org/10.1016/j.drugalcdep.2015.11.020>

- 513 Kang, S., Li, J., Zuo, W., Chen, P., Gregor, D., Fu, R., Han, X., Bekker, A., & Ye, J.-H. (2019).  
514 Downregulation of M-channels in lateral habenula mediates hyperalgesia during alcohol  
515 withdrawal in rats. *Scientific Reports*, 9(1), 2714. <https://doi.org/10.1038/s41598-018-38393-7>
- 516 Kliethermes, C. L., Cronise, K., & Crabbe, J. C. (2004). Anxiety-Like Behavior in Mice in Two  
517 Apparatuses During Withdrawal From Chronic Ethanol Vapor Inhalation. *Alcoholism: Clinical  
518 and Experimental Research*, 28(7), 1012–1019.  
519 <https://doi.org/10.1097/01.ALC.0000131976.40428.8F>
- 520 Koob, G. F., & Le Moal, M. (2008). Addiction and the Brain Antireward System. *Annual Review  
521 of Psychology*, 59(1), 29–53. <https://doi.org/10.1146/annurev.psych.59.103006.093548>
- 522 Lelbach, W. K. (1969). Liver cell necrosis in rats after prolonged ethanol ingestion under the  
523 influence of an alcohol-dehydrogenase inhibitor. *Experientia*, 25(8), 816–818.  
524 <https://doi.org/10.1007/BF01897894>
- 525 Littleton, J. M., Griffiths, P. J., & Ortiz, A. (1974). The induction of ethanol dependence and the  
526 ethanol withdrawal syndrome: The effects of pyrazole. *Journal of Pharmacy and Pharmacology*,  
527 26(2), 81–91. <https://doi.org/10.1111/j.2042-7158.1974.tb09230.x>
- 528 Lopez, M. F., & Becker, H. C. (2005). Effect of pattern and number of chronic ethanol exposures  
529 on subsequent voluntary ethanol intake in C57BL/6J mice. *Psychopharmacology*, 181(4), 688–  
530 696. <https://doi.org/10.1007/s00213-005-0026-3>
- 531 Maleki, N., Tahaney, K., Thompson, B. L., & Oscar-Berman, M. (2019). At the Intersection of  
532 Alcohol Use Disorder and Chronic Pain. *Neuropsychology*, 33(6), 795–807.  
533 <https://doi.org/10.1037/neu0000558>
- 534 Metten, P., Schlumbohm, J. P., Huang, L. C., Greenberg, G. D., Hack, W. R., Spence, S. E., &  
535 Crabbe, J. C. (2018). An alcohol withdrawal test battery measuring multiple behavioral  
536 symptoms in mice. *Alcohol*, 68, 19–35. <https://doi.org/10.1016/j.alcohol.2017.08.014>
- 537 Mogil, J. S., Chesler, E. J., Wilson, S. G., Juraska, J. M., & Sternberg, W. F. (2000). Sex  
538 differences in thermal nociception and morphine antinociception in rodents depend on genotype.  
539 *Neuroscience & Biobehavioral Reviews*, 24(3), 375–389. [https://doi.org/10.1016/S0149-7634\(00\)00015-4](https://doi.org/10.1016/S0149-7634(00)00015-4)
- 541 Morgan, A., Adank, D., Johnson, K., Blunt, E., & Patel, S. (2022). *2-Arachidonoylglycerol-  
542 mediated endocannabinoid signaling modulates mechanical hypersensitivity associated with  
543 alcohol withdrawal in mice* (p. 2022.02.15.480609). bioRxiv.  
544 <https://doi.org/10.1101/2022.02.15.480609>
- 545 Nelson, T. S., Fu, W., Donahue, R. R., Corder, G. F., Hökfelt, T., Wiley, R. G., & Taylor, B. K.  
546 (2019). Facilitation of neuropathic pain by the NPY Y1 receptor-expressing subpopulation of  
547 excitatory interneurons in the dorsal horn. *Scientific Reports*, 9(1), 7248.  
548 <https://doi.org/10.1038/s41598-019-43493-z>

- 549 Pahng, A. R., & Edwards, S. (2021). The Convergent Neuroscience of Affective Pain and  
550 Substance Use Disorder. *Alcohol Research: Current Reviews*, 41(1).
- 551 Paller, C. J., Campbell, C. M., Edwards, R. R., & Dobs, A. S. (2009). Sex-Based Differences in  
552 Pain Perception and Treatment. *Pain Medicine*, 10(2), 289–299. <https://doi.org/10.1111/j.1526-4637.2008.00558.x>
- 554 Popescu, A., LeResche, L., Truelove, E. L., & Drangsholt, M. T. (2010). Gender differences in  
555 pain modulation by diffuse noxious inhibitory controls: A systematic review. *PAIN*, 150(2), 309–  
556 318. <https://doi.org/10.1016/j.pain.2010.05.013>
- 557 Pradhan, A. A., Tipton, A. F., Zhang, H., Akbari, A., & Pandey, S. C. (2019). Effect of Histone  
558 Deacetylase Inhibitor on Ethanol Withdrawal-Induced Hyperalgesia in Rats. *International  
559 Journal of Neuropsychopharmacology*, 22(8), 523–527. <https://doi.org/10.1093/ijnp/pyz031>
- 560 Quadir, S. G., Tanino, S. M., Rohl, C. D., Sahn, J. J., Yao, E. J., Cruz, L. dos R., Cottone, P.,  
561 Martin, S. F., & Sabino, V. (2021). The Sigma-2 receptor / transmembrane protein 97  
562 ( $\sigma$ 2R/TMEM97) modulator JW-1034 reduces heavy alcohol drinking and associated pain states  
563 in male mice. *Neuropharmacology*, 184, 108409.  
564 <https://doi.org/10.1016/j.neuropharm.2020.108409>
- 565 Robins, M. T., Heinricher, M. M., & Ryabinin, A. E. (2019). From Pleasure to Pain, and Back  
566 Again: The Intricate Relationship Between Alcohol and Nociception. *Alcohol and Alcoholism  
567 (Oxford, Oxfordshire)*, 54(6), 625–638. <https://doi.org/10.1093/alcalc/agz067>
- 568 Rogers, J., Wiener, S. G., & Bloom, F. E. (1979). Long-term ethanol administration methods for  
569 rats: Advantages of inhalation over intubation or liquid diets. *Behavioral and Neural Biology*,  
570 27(4), 466–486. [https://doi.org/10.1016/S0163-1047\(79\)92061-2](https://doi.org/10.1016/S0163-1047(79)92061-2)
- 571 Roltsch Hellard, E. A., Impastato, R. A., & Gilpin, N. W. (2017). Intra-cerebral and intra-nasal  
572 melanocortin-4 receptor antagonist blocks withdrawal hyperalgesia in alcohol-dependent rats.  
573 *Addiction Biology*, 22(3), 692–701. <https://doi.org/10.1111/adb.12360>
- 574 Smith, M. L., Walcott, A. T., Heinricher, M. M., & Ryabinin, A. E. (2017). Anterior Cingulate  
575 Cortex Contributes to Alcohol Withdrawal- Induced and Socially Transferred Hyperalgesia.  
576 *ENeuro*, 4(4), ENEURO.0087-17.2017. <https://doi.org/10.1523/ENeuro.0087-17.2017>
- 577 Vendruscolo, L. F., & Roberts, A. J. (2014). Operant alcohol self-administration in dependent  
578 rats: Focus on the vapor model. *Alcohol*, 48(3), 277–286.  
579 <https://doi.org/10.1016/j.alcohol.2013.08.006>
- 580 Witkiewitz, K., Vowles, K. E., McCallion, E., Frohe, T., Kirouac, M., & Maisto, S. A. (2015).  
581 Pain as a Predictor of Heavy Drinking and Any Drinking Lapses in the COMBINE Study and the  
582 United Kingdom Alcohol Treatment Trial. *Addiction (Abingdon, England)*, 110(8), 1262–1271.  
583 <https://doi.org/10.1111/add.12964>

584   Zale, E. L., Maisto, S. A., & Ditre, J. W. (2015). Interrelations between Pain and Alcohol: An  
585   Integrative Review. *Clinical Psychology Review*, *37*, 57–71.  
586   <https://doi.org/10.1016/j.cpr.2015.02.005>

587
